# Supplementary material
Source: Springer Nature journal article supplement (https://www.springermedizin.de/resource/supplementary/12877_2014_955_MOESM1_ESM.pdf/9440788)
Supplement: MOESM1 [file 9440788]

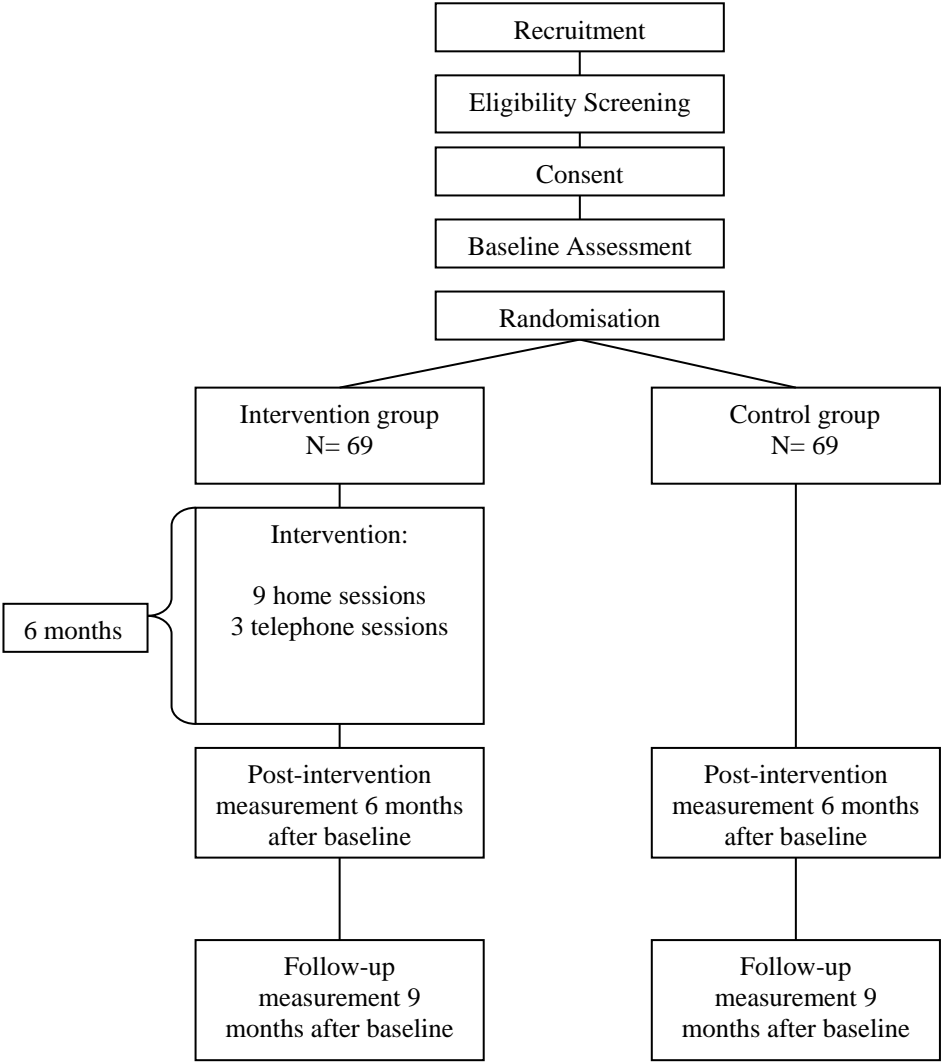

Recruitment

Eligibility Screening

Consent

Baseline Assessment

Randomisation

Intervention group  
N= 69

Control group  
N= 69

Intervention:  
9 home sessions  
3 telephone sessions

6 months

Post-intervention  
measurement 6 months  
after baseline

Follow-up  
measurement 9  
months after baseline

Post-intervention  
measurement 6 months  
after baseline

Follow-up  
measurement 9  
months after baseline
